# Supplementary material for: The key factors influencing patients in selecting autologous hematopoietic stem-cell transplantation as the main therapy for multiple myeloma: A population-based epidemiological study
Source: Research Square preprint supplement (doi:10.21203/rs.3.rs-1319734/v1), 2022-03-08
Supplement: Supplementary file 1 [file 79f48a0ad5ab4e970fac4084.docx]

**Supplementary Table 1 Socioeconomic features of the MM patients**

**Supplementary Table 2** **Main symptoms and first consultation department of the** **MM patients**
